# Supplementary material for: In situ characterization of crystal phase evolution of the LiNi0.6Co0.2Mn0.2O2 cathode at different current densities
Source: Royal Society of Chemistry journal article supplement (doi:10.1039/d3ta02279j), 2023-01-01
Supplement: d3ta02279j1.pdf [file d3ta02279j1.pdf]

## Supporting Information

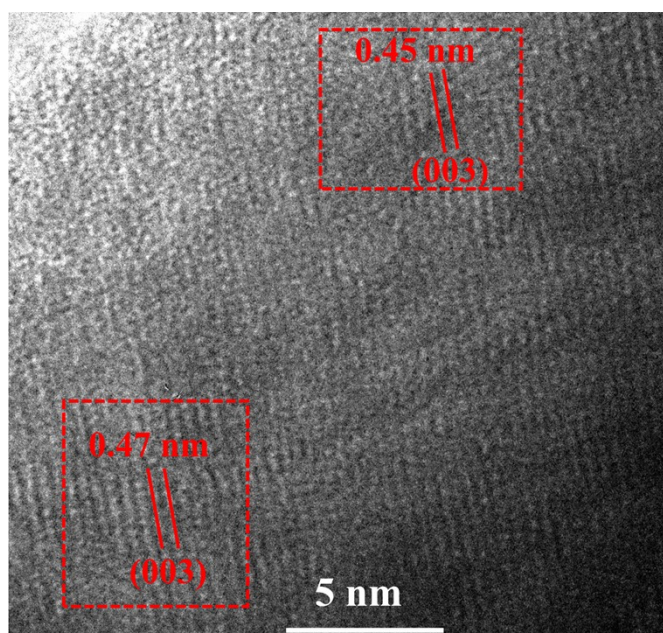

Fig. S1 TEM image of NCM622 after two cycles at a current density of 1C

|           | 0.5C     | a-H1   | c-H1    | a-H2   | c-H2    | a-S    | c-S     |
|-----------|----------|--------|---------|--------|---------|--------|---------|
| Charge    | Pristine | 2.8718 | 14.2048 |        |         |        |         |
|           | 3.8 V    | 2.8718 | 14.2048 |        |         |        |         |
|           | 3.9 V    | 2.8718 | 14.2048 | 2.862  | 14.3683 |        |         |
|           | 4.0 V    | 2.8634 | 14.2048 | 2.8211 | 14.4511 |        |         |
|           | 4.1 V    | 2.8629 | 14.2865 | 2.8211 | 14.4511 |        |         |
|           | 4.2 V    |        |         | 2.8133 | 14.4535 |        |         |
|           | 4.3 V    |        |         | 2.813  | 14.4511 |        |         |
|           | 4.2 V    |        |         |        |         | 2.8135 | 14.3699 |
|           | 4.1 V    |        |         |        |         | 2.8142 | 14.4535 |
|           | 4.0 V    |        |         |        |         | 2.8193 | 14.4558 |
| Discharge | 3.9 V    |        |         |        |         | 2.821  | 14.4683 |
|           | 3.8 V    |        |         |        |         | 2.8212 | 14.4816 |
|           | 3.0 V    |        |         |        |         | 2.8594 | 14.2918 |
|           | 3.8 V    |        |         |        |         | 2.8467 | 14.3315 |
|           | 3.9 V    |        |         |        |         | 2.8296 | 14.3699 |
| Charge    | 4.0 V    |        |         |        |         | 2.8248 | 14.4364 |
|           | 4.1 V    |        |         |        |         | 2.8205 | 14.4496 |
|           | 4.2 V    |        |         |        |         | 2.8182 | 14.4589 |
|           | 4.3 V    |        |         |        |         | 2.8124 | 14.4496 |
|           | 4.2 V    |        |         |        |         | 2.8131 | 14.4434 |
|           | 4.1 V    |        |         |        |         | 2.8158 | 14.4496 |
|           | 4.0 V    |        |         |        |         | 2.8177 | 14.4558 |
|           | 3.9 V    |        |         |        |         | 2.8198 | 14.4628 |
|           | 3.8 V    |        |         |        |         | 2.821  | 14.4691 |
|           | 3.0 V    | 2.854  | 14.2842 | 2.8238 | 14.4496 |        |         |

**Tab. S1** The parameters of the a-axis and c-axis at a current density of 0.5C

|           | 1C        | a-H1   | c-H1    | a-H2   | c-H2    | a-S    | c-S     |
|-----------|-----------|--------|---------|--------|---------|--------|---------|
| Charge    | Pristine  | 2.8718 | 14.2048 |        |         |        |         |
|           | 3.8 V     | 2.8699 | 14.2123 |        |         |        |         |
|           | 3.9 V     | 2.8688 | 14.2138 |        |         |        |         |
|           | 4.0 V     | 2.868  | 14.2251 |        |         |        |         |
|           | 4.1 V     | 2.8664 | 14.2266 | 2.8233 | 14.4193 |        |         |
|           | 4.2 V     | 2.8634 | 14.204  | 2.817  | 14.4426 |        |         |
|           | 4.3 V     | 2.8633 | 14.2    | 2.8125 | 14.4387 |        |         |
|           | 4.2 V     |        |         |        |         | 2.817  | 14.4426 |
|           | 4.1 V     |        |         |        |         | 2.8202 | 14.4582 |
|           | 4.0 V     |        |         |        |         | 2.8205 | 14.4613 |
| Discharge | 3.9 V     |        |         |        |         | 2.8209 | 14.473  |
|           | 3.8 V     |        |         |        |         | 2.8212 | 14.4769 |
|           | 3.0 V     |        |         |        |         | 2.8546 | 14.343  |
|           | 3.8 V     |        |         |        |         | 2.8435 | 14.3622 |
|           | 3.9 V     |        |         |        |         | 2.8308 | 14.4271 |
|           | 4.0 V     |        |         |        |         | 2.8277 | 14.4465 |
| Charge    | 4.1 V     |        |         |        |         | 2.8217 | 14.4504 |
|           | 4.2 V     |        |         |        |         | 2.8202 | 14.4543 |
|           | 4.3 V     |        |         |        |         | 2.8136 | 14.4504 |
|           | 4.2 V     |        |         |        |         | 2.8198 | 14.4613 |
|           | 4.1 V     |        |         |        |         | 2.8205 | 14.4769 |
|           | 4.0 V     |        |         |        |         | 2.8206 | 14.4847 |
|           | 3.9 V     |        |         |        |         | 2.8211 | 14.4925 |
|           | 3.8 V     |        |         |        |         | 2.8273 | 14.455  |
|           | 3.0 V     | 2.8542 | 14.2865 | 2.8303 | 14.4465 |        |         |
|           | Discharge |        |         |        |         |        |         |

**Tab. S2** The parameters of the a-axis and c-axis at a current density of 1C

|           | 3C       | a-H1   | c-H1    | a-H2   | c-H2    | a-S    | c-S     |
|-----------|----------|--------|---------|--------|---------|--------|---------|
| Charge    | Pristine | 2.8718 | 14.2048 |        |         |        |         |
|           | 3.8 V    | 2.8702 | 14.2058 |        |         |        |         |
|           | 3.9 V    | 2.8673 | 14.2063 |        |         |        |         |
|           | 4.0 V    | 2.8641 | 14.2069 |        |         |        |         |
|           | 4.1 V    | 2.8623 | 14.2078 | 2.8205 | 14.3999 |        |         |
|           | 4.2 V    | 2.8622 | 14.2123 | 2.8167 | 14.4123 |        |         |
|           | 4.3 V    | 2.8621 | 14.204  | 2.8134 | 14.4116 |        |         |
|           | 4.2 V    |        |         |        |         | 2.8139 | 14.4543 |
|           | 4.1 V    |        |         |        |         | 2.8161 | 14.4582 |
|           | 4.0 V    |        |         |        |         | 2.8194 | 14.4597 |
| Discharge | 3.9 V    |        |         |        |         | 2.82   | 14.4621 |
|           | 3.8 V    |        |         |        |         | 2.8212 | 14.4855 |
|           | 3.0 V    |        |         |        |         | 2.8409 | 14.3699 |
|           | 3.8 V    |        |         |        |         | 2.8359 | 14.3776 |
|           | 3.9 V    |        |         |        |         | 2.8297 | 14.4271 |
| Charge    | 4.0 V    |        |         |        |         | 2.8292 | 14.4465 |
|           | 4.1 V    |        |         |        |         | 2.8229 | 14.4488 |
|           | 4.2 V    |        |         |        |         | 2.8169 | 14.4504 |
|           | 4.3 V    |        |         |        |         | 2.8124 | 14.4309 |
|           | 4.2 V    |        |         |        |         | 2.8129 | 14.4348 |
| Discharge | 4.1 V    |        |         |        |         | 2.8136 | 14.4457 |
|           | 4.0 V    |        |         |        |         | 2.8141 | 14.4504 |
|           | 3.9 V    |        |         |        |         | 2.815  | 14.4621 |
|           | 3.8 V    |        |         |        |         | 2.8186 | 14.473  |
|           | 3.0 V    |        |         |        |         | 2.8406 | 14.3583 |

**Tab. S3.** The parameters of the a-axis and c-axis at a current density of 3C

|           | 5C       | a-H1   | c-H1    | a-H2   | c-H2    | a-S    | c-S     |
|-----------|----------|--------|---------|--------|---------|--------|---------|
| Charge    | Pristine | 2.8718 | 14.2048 |        |         |        |         |
|           | 3.8 V    | 2.8707 | 14.2086 |        |         |        |         |
|           | 3.9 V    | 2.8684 | 14.2123 |        |         |        |         |
|           | 4.0 V    | 2.868  | 14.2161 |        |         |        |         |
|           | 4.1 V    | 2.8657 | 14.2199 | 2.8212 | 14.4123 |        |         |
|           | 4.2 V    | 2.8634 | 14.2078 | 2.8211 | 14.4232 |        |         |
|           | 4.3 V    | 2.863  | 14.2046 | 2.8158 | 14.4224 |        |         |
|           | 4.2 V    |        |         |        |         | 2.8165 | 14.4379 |
|           | 4.1 V    |        |         |        |         | 2.8167 | 14.4387 |
|           | 4.0 V    |        |         |        |         | 2.8168 | 14.4473 |
| Discharge | 3.9 V    |        |         |        |         | 2.8212 | 14.4519 |
|           | 3.8 V    |        |         |        |         | 2.8252 | 14.4535 |
|           | 3.0 V    |        |         |        |         | 2.8363 | 14.376  |
|           | 3.8 V    |        |         |        |         | 2.8391 | 14.3799 |
|           | 3.9 V    |        |         |        |         | 2.8288 | 14.4309 |
| Charge    | 4.0 V    |        |         |        |         | 2.8256 | 14.4519 |
|           | 4.1 V    |        |         |        |         | 2.8216 | 14.4535 |
|           | 4.2 V    |        |         |        |         | 2.8168 | 14.4473 |
|           | 4.3 V    |        |         |        |         | 2.8139 | 14.4441 |
|           | 4.2 V    |        |         |        |         | 2.8158 | 14.4451 |
| Discharge | 4.1 V    |        |         |        |         | 2.8173 | 14.4465 |
|           | 4.0 V    |        |         |        |         | 2.8207 | 14.4519 |
|           | 3.9 V    |        |         |        |         | 2.8215 | 14.4566 |
|           | 3.8 V    |        |         |        |         | 2.8217 | 14.4473 |
|           | 3.0 V    |        |         |        |         | 2.8459 | 14.3683 |

**Tab. S4** The parameters of the a-axis and c-axis at a current density of 5C

|               | 10C              | a-H1   | c-H1    | a-H2    | c-H2    |         |
|---------------|------------------|--------|---------|---------|---------|---------|
| <b>Charge</b> | Pristine         | 2.8718 | 14.2048 |         |         |         |
|               | 3.8 V            | 2.8718 | 14.2048 |         |         |         |
|               | 3.9 V            | 2.8718 | 14.2048 |         |         |         |
|               | 4.0 V            | 2.8718 | 14.2048 |         |         |         |
|               | 4.1 V            | 2.8718 | 14.2048 | 2.8296  | 14.376  |         |
|               | 4.2 V            | 2.8718 | 14.2048 | 2.8128  | 14.374  |         |
|               | 4.3 V            | 2.8718 | 14.2048 | 2.8123  | 14.3722 |         |
|               | <b>Discharge</b> | 4.2 V  | 2.8718  | 14.2048 | 2.8129  | 14.4154 |
|               |                  | 4.1 V  | 2.8718  | 14.2048 | 2.8141  | 14.4465 |
|               |                  | 4.0 V  | 2.8718  | 14.2048 | 2.8145  | 14.4418 |
| 3.9 V         |                  | 2.8718 | 14.2048 | 2.8202  | 14.4473 |         |
| 3.8 V         |                  | 2.8718 | 14.2048 | 2.8209  | 14.4162 |         |
| 3.0 V         |                  | 2.8718 | 14.2048 | 2.8311  | 14.3653 |         |
| <b>Charge</b> |                  | 3.8 V  | 2.8718  | 14.2048 | 2.8296  | 14.3699 |
|               |                  | 3.9 V  | 2.8718  | 14.2048 | 2.8217  | 14.4356 |
|               |                  | 4.0 V  | 2.8718  | 14.2048 | 2.8202  | 14.4309 |
|               |                  | 4.1 V  | 2.8718  | 14.2048 | 2.8146  | 14.4054 |
|               | 4.2 V            | 2.8718 | 14.2048 | 2.8138  | 14.376  |         |
|               | 4.3 V            | 2.8718 | 14.2048 | 2.8132  | 14.3699 |         |
|               | <b>Discharge</b> | 4.2 V  | 2.8718  | 14.2048 | 2.8137  | 14.3953 |
|               |                  | 4.1 V  | 2.8718  | 14.2048 | 2.8141  | 14.4465 |
|               |                  | 4.0 V  | 2.8718  | 14.2048 | 2.8143  | 14.448  |
|               |                  | 3.9 V  | 2.8718  | 14.2048 | 2.8202  | 14.4504 |
| 3.8 V         |                  | 2.8718 | 14.2048 | 2.8211  | 14.4566 |         |
| 3.0 V         |                  | 2.8712 | 14.2857 | 2.8391  | 14.3653 |         |

**Tab. S5** The parameters of the a-axis and c-axis at a current density of 10C
